# Supplementary material
Source: Springer Nature journal article supplement (https://www.springermedizin.de/resource/supplementary/12913_2014_3525_MOESM3_ESM.pdf/9533044)

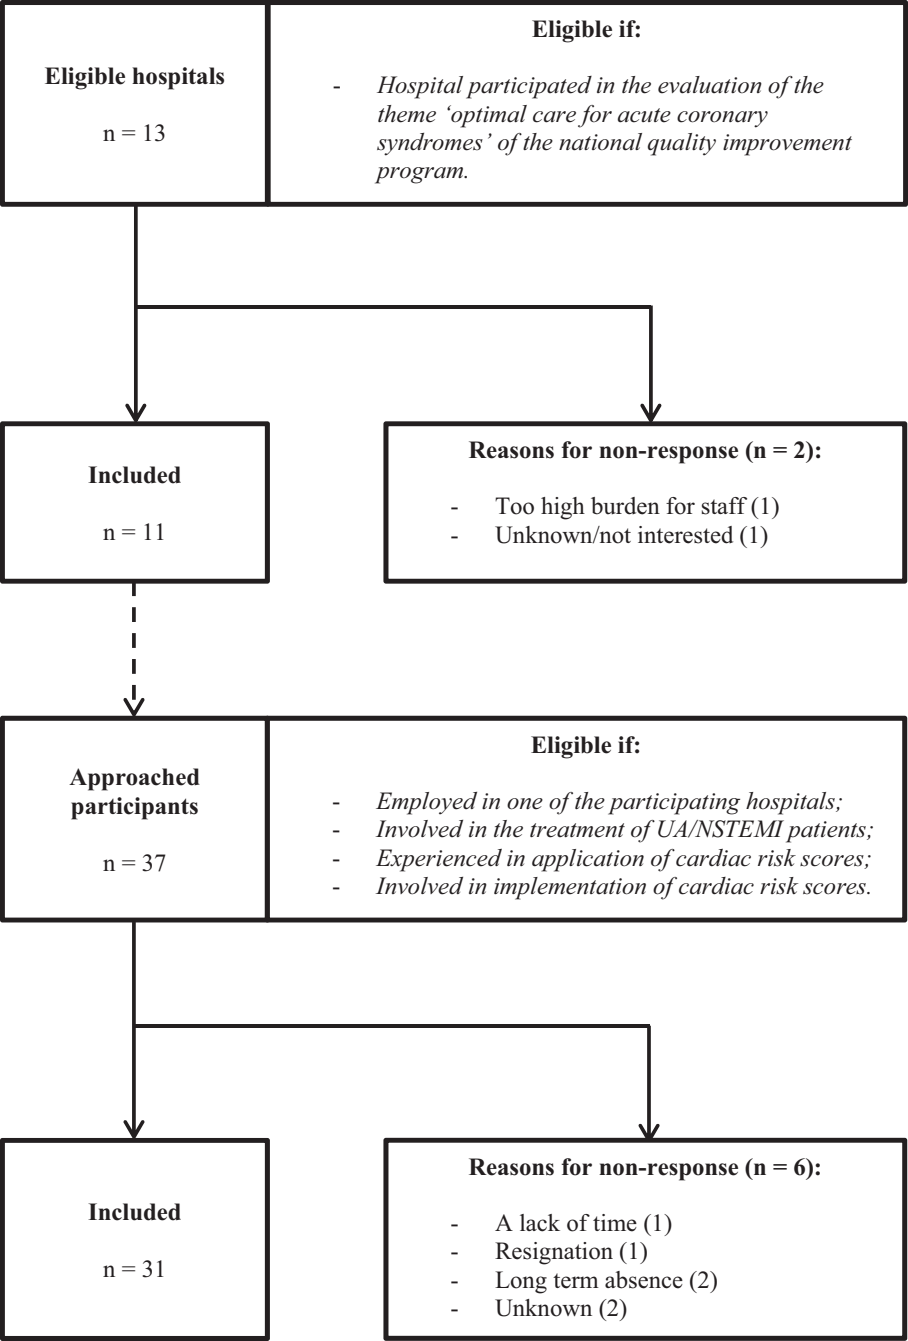

Supplement: MOESM3 [file 9533044]
